# Duration of Severe Acute Respiratory Syndrome Coronavirus 2 (SARS-CoV-2) Infectivity: When Is It Safe to Discontinue Isolation?

Chanu Rhee,<sup>1,2,3</sup> Sanjat Kanjilal,<sup>1,2</sup> Meghan Baker,<sup>1,2,3</sup> and Michael Klompas<sup>1,2,3</sup>

<sup>1</sup>Department of Population Medicine, Harvard Medical School/Harvard Pilgrim Health Care Institute, Boston, Massachusetts, USA, <sup>2</sup>Division of Infectious Diseases, Brigham and Women's Hospital, Boston, Massachusetts, USA, and <sup>3</sup>Infection Control Department, Brigham and Women's Hospital, Boston, Massachusetts, USA

Defining the duration of infectivity of Severe Acute Respiratory Syndrome Coronavirus 2 (SARS-CoV-2) has major implications for public health and infection control practice in healthcare facilities. Early in the pandemic, most hospitals required 2 negative RT-PCR tests before discontinuing isolation in patients with Covid-19. Many patients, however, have persistently positive RT-PCR tests for weeks to months following clinical recovery, and multiple studies now indicate that these generally do not reflect replication-competent virus. SARS-CoV-2 appears to be most contagious around the time of symptom onset, and infectivity rapidly decreases thereafter to near-zero after about 10 days in mild-moderately ill patients and 15 days in severely-critically ill and immunocompromised patients. The longest interval associated with replication-competent virus thus far is 20 days from symptom onset. This review summarizes evidence-to-date on the duration of infectivity of SARS-CoV-2, and how this has informed evolving public health recommendations on when it is safe to discontinue isolation precautions.

**Keywords.** SARS-CoV-2; COVID-19; transmission-based precautions; isolation.

Severe acute respiratory syndrome coronavirus 2 (SARS-CoV-2), the virus that causes Covid-19, has infected millions of people worldwide. Understanding the duration of SARS-CoV-2 infectivity has major implications for public health and infection control efforts. Prematurely releasing patients from isolation risks fueling transmission. Unnecessarily prolonging isolation, however, is frustrating for patients, consumes personal protective equipment, can delay procedures and other medical care, locks up scarce private and airborne infection isolation rooms, separates patients from social support, and may impede discharge. Policies that permit a timely but safe return to work for infected healthcare workers are also critical, particularly in hospitals facing staffing shortages. Furthermore, repeated RT-PCR testing for clearance consumes testing supplies and repeated nasopharyngeal swabs can cause nontrivial discomfort.

In this article, we review the current knowledge about the duration of SARS-CoV-2 transmissibility and how this has informed evolving recommendations from the World Health Organization (WHO) and U.S. Centers for Disease Control and Prevention (CDC).

## INCUBATION PERIOD AND PEAK VIRAL LOAD

The median incubation period for SARS-CoV-2 is 4–5 days, with an interquartile range of 2–7 days [1, 2]. Approximately 98% of infected individuals who develop symptoms do so within 12 days [3]. Viral RNA levels are detectable in the respiratory tract 2–3 days before symptoms appear, peak at symptom onset, and decline over the following 7–8 days in most patients [4–8]. The capacity of asymptomatic and presymptomatic people to transmit virus prior to symptom onset is well documented [9–13]. SARS-CoV-2 therefore appears to have similar transmission dynamics to influenza, which is also contagious before and through several days after symptom onset [14–16].

## DURATION OF PCR POSITIVITY

Early in the pandemic, WHO and CDC recommended test-based clearance with at least two negative RT-PCR tests for patients with Covid-19. This strategy, however, can lead to prolonged isolation, as some patients have positive RT-PCR assays for weeks if not months [17–22]. Sicker patients tend to have detectable RNA for longer periods, but prolonged PCR positivity also occurs in mildly ill and asymptomatic individuals [6, 8, 23–28]. The duration of PCR positivity appears to be longer in lower respiratory tract versus upper respiratory tract samples, as well as in stool samples [26, 29–32]. In addition, some patients recover from Covid-19, have two negative tests, and then test positive again even in the absence of new symptoms [33, 34].

Received 22 July 2020; editorial decision 18 August 2020; accepted 20 August 2020; published online August 25, 2020.

Correspondence: C. Rhee, Department of Population Medicine, Harvard Medical School and Harvard Pilgrim Health Care Institute, 401 Park Drive, Suite 401, Boston, MA 02215 (crhee@bwh.harvard.edu).

Clinical Infectious Diseases® 2021;72(8):1467–74

© The Author(s) 2020. Published by Oxford University Press for the Infectious Diseases Society of America. All rights reserved. For permissions, e-mail: journals.permissions@oup.com.

DOI: 10.1093/cid/ciaa1249

## INTERPRETING PCR TEST RESULTS: CYCLE THRESHOLDS AND NUCLEIC ACID QUANTITY

While PCR tests are reported as a binary result, the cycle threshold (Ct) value—the number of PCR cycles required for the sample fluorescence to exceed a predefined threshold—provides additional useful information. The Ct value is inversely related to the amount of nucleic acid present in the sample, such that every increase in Ct value of ~3.3 corresponds to a 10-fold reduction in the amount of nucleic acid [35]. Most SARS-CoV-2 PCR assays use a Ct cutoff of <40 for positivity. Patients in the early stages of infection usually have Ct values of 20–30 or less [36]. Ct values tend to increase thereafter, reflecting progressively lower amounts of viral RNA as the immune response clears the infection.

Ct values must be interpreted with caution as they do not reflect a true viral load, which requires standardization using reference curves. As such, they are not directly comparable across assays [37]. Furthermore, differences in specimen collection quality and reaction conditions can introduce further variation [38, 39]. This imprecision in PCR testing is most apparent when the amount of viral nucleic acid at the sampling site approaches the limit of detection for the assay and is the most common reason for why some patients alternate between testing negative and testing positive. Lastly, only traditional real-time PCR assays produce a Ct value; assays that use isothermal amplification do not produce a Ct value and nested PCR assays are not designed for quantitative interpretation [40].

## ASSESSING DURATION OF INFECTIVITY BY CELL CULTURE

It is now clear that persistent RNA detection does not necessarily translate into viable virus that can infect others. Subgenomic RNA fragments associate tightly with intracellular vesicles that protect them from degradation by host enzymes, which may explain why PCR tests are persistently positive in many patients [41]. The ability of SARS-CoV-2 to replicate in cultured cells is a better surrogate for infectivity. In a hamster study, for example, transmissibility of SARS-CoV-2 correlated with detection of infectious virus by culture, but not by RT-PCR positivity alone [42]. The possibility of human transmission despite nonculturable virus cannot be ruled out, since no study has attempted to link the presence of culturable virus directly to infectivity in humans. However, an increasing body of evidence suggests that time from symptom onset and Ct values are both useful proxies for infectivity. Notably, SARS-CoV-2 viral culture is not used in routine practice, as it can only be performed by specialized laboratories that meet minimum standards for biosafety.

Table 1 summarizes the evidence that persistently positive SARS-CoV-2 RNA PCRs are due to residual viral “debris” rather than replication-competent virus. The first study to make

this suggestion was an analysis of 9 hospitalized patients with mild-moderate disease [6]. RNA was detectable by PCR for weeks after onset of symptoms in some patients; however, virus was only isolated by culture during the first week of symptoms and could not be cultured from any samples taken >8 days following symptom onset.

Likewise, the US CDC reported they have not been able to isolate culture replication-competent virus from patients >9 days from symptom onset [43]. These data were generated from adult patients spanning a range of ages and severities of illness, although CDC did not specify the number of patients in their analysis. Attempts to culture virus from upper respiratory specimens were unsuccessful when PCR Ct values were higher than 35 (ie, a low but detectable range of viral nucleic acid). Ct values from upper respiratory specimens were high following recovery from clinical illness, suggesting viral debris rather than replication-competent virus. Lastly, the CDC reported that they have not cultured infectious virus from urine or from feces, suggesting these sources pose minimal risk of transmission, particularly following hand hygiene. Note, however, that investigators have been able to culture infectious virus from feces in at least one patient [52].

Similar results were reported in two studies from Southern France that retrospectively examined the effect of hydroxychloroquine and azithromycin on clinical and virologic outcomes [45, 46]. In the first analysis, 183 PCR-positive samples (including 174 nasopharyngeal swabs and 9 sputum) from 155 patients were inoculated in cell cultures, of which 129 led to successful isolation [45]. Samples with Ct values of 13–17 were all associated with positive viral cultures. The culture positivity rate steadily decreased with rising Ct values, and no virus was successfully cultured from samples with Ct values  $\geq 34$ . PCR tests were positive for up to 20 days after symptom onset, but viable virus could not be cultured after day 8. In the second analysis, 11 patients in whom daily cultures were attempted were negative by day 10 [46].

Canadian investigators provided similar results from an analysis of 90 PCR-positive samples, including nasopharyngeal swabs and endotracheal aspirates, taken through 21 days after symptom onset [47]. Virus could not be cultured after 8 days from symptom onset or when Ct values were greater than 24. The probability of successfully culturing SARS-CoV-2 was highest between days 1–5 and peaked at day 3. Every unit increase in Ct value was associated with a decrease in the odds of successfully culturing virus by 32%.

In an analysis of hospitalized patients with Covid-19 in Singapore, viral culture was positive from respiratory samples in 14 of 73 patients [44]. Viral culture was unsuccessful in all samples with Ct values >30, and 90% of samples taken after day 14 from symptom onset had Ct values >30.

A study from the Netherlands specifically focused on patients with severe illness, including immunocompromised

**Table 1. Summary of Studies Assessing Duration of SARS-CoV-2 Infectivity Based on Viral Cell Culture or Secondary Infection Rates**

| Study (Country)                                                      | Population                                                                                                                                                    | Primary findings                                                                                                                                                                                                                                                                                                                                                                                                                                                                |
|----------------------------------------------------------------------|---------------------------------------------------------------------------------------------------------------------------------------------------------------|---------------------------------------------------------------------------------------------------------------------------------------------------------------------------------------------------------------------------------------------------------------------------------------------------------------------------------------------------------------------------------------------------------------------------------------------------------------------------------|
| Wolfe et al. [6] (Germany)                                           | 9 young to middle-aged patients with mild disease                                                                                                             | <ul style="list-style-type: none"> <li>• Peak viral load prior to day 5 after symptom onset</li> <li>• Virus unable to be cultured after day 8 from respiratory samples despite ongoing high viral load</li> <li>• Virus unable to be cultured from stool, even with high viral load</li> </ul>                                                                                                                                                                                 |
| U.S. Centers for Disease Control and Prevention [43] (U.S.)          | Per CDC, data generated from adults across a variety of age groups and with varying severity of illness (unspecified number of patients)                      | <ul style="list-style-type: none"> <li>• Virus unable to be cultured more than 9 days after symptom onset</li> <li>• Attempts to culture virus from upper respiratory specimens largely unsuccessful when Ct values &gt;33–35</li> <li>• Among patients who continue to have detectable RNA in upper respiratory specimens following clinical illness, concentrations are generally in the range at which replication-competent virus has not been reliably isolated</li> </ul> |
| Young et al. [44] (Singapore)                                        | 100 hospitalized patients (20 requiring supplemental oxygen and 12 requiring mechanical ventilation)                                                          | <ul style="list-style-type: none"> <li>• Viral culture unsuccessful in all PCR-positive samples with Ct values &gt;30</li> <li>• 90% of all samples taken after day 14 from symptom onset had Ct values &gt;30</li> </ul>                                                                                                                                                                                                                                                       |
| La Scola et al. [45] (France)                                        | 183 PCR-positive samples (174 nasopharyngeal, 9 sputum) from 155 patients (unknown severity of illness)                                                       | <ul style="list-style-type: none"> <li>• PCR tests positive for up to 20 days after symptom onset, but virus unable to be cultured after day 8</li> <li>• Samples with Ct values 13–17 all led to positive culture</li> <li>• No virus was successfully cultured when Ct values were ≥34</li> <li>• Virus unable to be cultured after day 10</li> </ul>                                                                                                                         |
| Million et al. [46] (France)                                         | 11 hospitalized PCR-positive patients in whom daily cultures were attempted past 10 days                                                                      | <ul style="list-style-type: none"> <li>• Virus unable to be cultured after day 8 from symptom onset, or when Ct values were &gt;24</li> <li>• Probability of culturing virus highest between days one and five and peaked on day 3</li> <li>• Each 1 unit increase in Ct value correlated with 32% decrease in odds of culturing virus</li> </ul>                                                                                                                               |
| Bullard et al. [47] (Canada)                                         | 90 PCR-positive nasopharyngeal or endotracheal aspirate samples taken through day 21 after symptom onset (unknown number of patients and severity of illness) | <ul style="list-style-type: none"> <li>• PCR positive through day 63 after symptom onset, but virus unable to be cultured after 18 days</li> <li>• Median duration of infectious shedding by viral culture = 8 days after symptom onset (IQR 5–11 days, maximum 20 days)</li> <li>• Probability of obtaining infectious virus fell to &lt;5% after 15 days from symptom onset</li> <li>• Detection of viral RNA by PCR exceeded detection by culture</li> </ul>                 |
| Liu et al. [25] (Taiwan)                                             | 1 PCR-positive patient with mild febrile illness                                                                                                              | <ul style="list-style-type: none"> <li>• Amongst 2761 close contacts, secondary attack rate was 0.7% amongst 1818 people who had contact within 5 days of symptom onset and 0% amongst 852 people who had contact ≥6 days after symptom onset</li> </ul>                                                                                                                                                                                                                        |
| van Kampen et al. [48] (Netherlands)                                 | 690 upper and lower respiratory samples taken from 129 hospitalized patients with severe or critical illness, including 30 immunosuppressed patients          | <ul style="list-style-type: none"> <li>• Viral cell culture and full-length genome sequencing unsuccessful in all cases</li> </ul>                                                                                                                                                                                                                                                                                                                                              |
| Cheng et al. [49] (Taiwan)                                           | 100 patients with Covid-19 (mostly mild disease)                                                                                                              | <ul style="list-style-type: none"> <li>• 0% transmission to 790 contacts during re-positive period</li> </ul>                                                                                                                                                                                                                                                                                                                                                                   |
| Lu et al. [50] (China)                                               | 87 patients hospitalized with Covid-19, discharged after recovery and 2 consecutive negative PCR swabs, and then tested positive again within 2 weeks         | <ul style="list-style-type: none"> <li>• Viral cell culture negative in 108 cases</li> <li>• Ct values for re-positive tests &gt;30 in 89.5% of cases</li> </ul>                                                                                                                                                                                                                                                                                                                |
| Korean Centers for Disease Control and Prevention [51] (South Korea) | 285 patients who recovered from Covid-19, tested negative, and then tested positive again by PCR (on average 45 days after initial symptom onset)             | <ul style="list-style-type: none"> <li>• 0% transmission to 790 contacts during re-positive period</li> </ul>                                                                                                                                                                                                                                                                                                                                                                   |

patients [48]. Of the 129 patients in the study, 69% were in intensive care units, 31% were in noncritical care units (most of whom required supplemental oxygen), 23% and were immunosuppressed. The investigators tested 690 upper and lower respiratory samples at various time points for viable virus using cell culture; 23 of the 129 patients (17.8%) had replication-competent virus. The median interval of infectious shedding by culture was 8 days after symptom onset (interquartile range 5–11). The maximum interval from symptom onset associated with viable virus was 20 days (occurring in one patient); unfortunately, the clinical characteristics and illness trajectory of this patient were not reported. The median viral load was significantly higher in culture-positive samples than culture-negative samples, and the probability of detecting replication-competent virus was <5% after 15 days from symptom onset.

Although the duration of infectivity is generally longer in severe illness, outliers may be possible. One case report from Taiwan, for example, noted infectious shedding by viral cell culture in the sputum 18 days after symptom onset in a patient with a mild febrile illness [53]. In addition, effective antiviral therapy is associated with a shorter time to negative SARS-CoV-2 viral load, although its impact on transmissibility has not yet been established [54].

#### **EPIDEMIOLOGICAL DATA ON TRANSMISSIBILITY**

The data on duration of viral recovery in cell culture following symptom onset are mirrored by data on transmission rates. In a prospective study conducted in Taiwan, 100 confirmed Covid-19 cases and their contacts were identified and the secondary clinical attack rate was measured for different time intervals from symptom-onset [49]. There were 2761 close contacts of the 100 cases; the secondary attack rate was 0.7% amongst the 1818 people with contact with case patients within 5 days of symptom onset and 0% amongst the 852 people with contact >5 days after symptom onset. As with other studies, attack rates were highest among household and family contacts (~5%) and substantially lower amongst healthcare contacts (0.9%). Notably, though, only 6 of the confirmed index cases had severe disease; the 786 close contacts of these severely ill patients were about 4 times more likely to acquire infection compared to the 1097 close contacts of 56 patients with mild disease.

#### **SIGNIFICANCE OF PATIENTS WHO TEST PCR-POSITIVE AFTER TESTING NEGATIVE**

Investigators from Guangdong Province, China, analyzed 619 hospitalized patients with Covid-19 who were discharged after resolution of fever, improvement in respiratory symptoms, and 2 consecutive negative PCR samples >24 h apart on both respiratory tract and gastrointestinal tract samples [50]. All discharged cases were isolated in designated hotels, kept in observation, and retested on days 7 and 14 after recovery. 87 patients (14.1%)

tested positive, of whom 77 were asymptomatic and 10 had mild cough. Viral cell culture was unsuccessful in all cases; furthermore, full-length genomes could not be sequenced in any cases, suggesting genome degradation.

Similarly, the Korean CDC reported on epidemiologic and contact tracing for 285 patients who recovered from Covid-19, tested negative, and then tested positive again by PCR [51]. On average, the re-positive test occurred 45 days after initial symptom onset (range 8–82 days). Retesting was done in 37.5% of patients because of new symptoms such as cough or sore throat. Viral cell culture testing was done in 108 re-positive cases, and all were negative. PCR Ct values were >30 in 89.5% of cases, suggesting that the negative-to-positive phenomenon represents sampling variability near the assay limit of detection. None of 790 contacts of the 285 re-positive cases (including 351 family members) developed Covid-19.

#### **DEGREE AND DURATION OF IMMUNITY FOLLOWING INFECTION**

An important question is to what degree individuals who have recovered from Covid-19 are vulnerable to SARS-CoV-2 re-infection and how long immunity might last. Animal studies demonstrate that infection provides at least short-term immunity. One group of investigators experimentally infected 9 rhesus macaques with SARS-CoV-2, after which all developed neutralizing antibodies [55]. When the monkeys were re-challenged with the same viral dose 35 days later, all demonstrated anamnestic immune responses, with lower nasal viral RNA levels and more rapid declines in viral RNA compared to the initial challenge and compared to control monkeys. A separate study conducted in China using 7 rhesus macaque monkeys demonstrated similar findings [56]. Monkeys were infected and underwent a mild-to-moderate course of disease. Four of the seven macaques were re-challenged 28 days later; none showed any clinical signs of disease, viral dissemination, or histopathological changes on necropsy.

In humans, several cases of re-infection with SARS-CoV-2 have now been confirmed using whole genome sequencing. Although the true incidence of re-infection shortly after an initial infection is unknown, it is likely rare. As described above, most obsolete reports of recurrent positive PCR tests likely reflect residual RNA with high Ct values. Small case series in humans also suggest that neutralizing antibodies develop in most patients following recovery from Covid-19, and that titers correlate with severity of illness and the number of virus-specific T-cells [5, 6, 57–60]. However, in one study of 74 patients with symptomatic and asymptomatic infection, most demonstrated a decrease in IgG levels and neutralizing antibodies within 2–3 months after infection; 40% of asymptomatic individuals became seronegative in the early convalescent phase, compared to 12.9% of symptomatic patients [61]. Another study demonstrated an IgG half-life of 73 days in patients with mild illness



[62]. It is unclear, however, whether and to what extent the decrease in measurable antibody levels correlates with loss of functional immunity.

### SUMMARY AND IMPLICATIONS FOR PUBLIC HEALTH RECOMMENDATIONS

In summary, based on a rapidly expanding evidence base, we currently draw the following conclusions regarding the timing and duration of SARS-CoV-2 transmissibility (Figure 1):

1. SARS-CoV-2 is most contagious right before and immediately following symptom onset.
2. Contagiousness rapidly decreases to near-zero after about 10 days from symptom onset in mild-moderately ill patients and 15 days in critically ill and immunocompromised patients. The longest duration of viral viability that has been reported thus far is 20 days from symptom onset.
3. Persistently positive SARS-CoV-2 RNA PCRs in recovered patients are common but are generally associated with high Ct values, reflecting low viral loads. These do not indicate replication-competent virus and are not associated with contagiousness.
4. PCR assays that alternate between positive and negative results in patients who have recovered from Covid-19 most likely reflect sampling variability and low levels of viral debris at the borderline of detection. These patients are unlikely to be contagious.
5. Infection confers at least short-term immunity in most cases; however, the duration of immunity is unclear and several cases of re-infection have now been confirmed.

These data have informed evolving national and international public health recommendations (Table 2). WHO, for example, initially recommended 2 negative PCR results on sequential samples taken >24 h apart in clinically recovered patients before

discontinuing isolation. On May 27, WHO shifted to recommending isolation for 10 days after symptom onset, plus at least 3 additional days without symptoms [63]. In asymptomatic patients, WHO recommends discontinuing isolation 10 days after the positive PCR test. WHO still allows providers the option of using serial negative tests to clear patients but acknowledges that some patients have prolonged viral RNA detection by PCR that does not correlate with infectivity.

In July and August, CDC modified their guidance to a more nuanced approach based on severity-of-illness and immunocompetence [64]. Specifically, while CDC still recommends 10 days of isolation from symptom onset (including >24 h since resolution of fever and improvement in symptoms) for mild-moderately ill patients without severely immunocompromising conditions, they now recommend at least 10 days and up to 20 days for patients with severe-critical illness or severely immunocompromising conditions. For asymptomatic patients, 10 days is recommended from the first positive PCR test (and up to 20 days for severely immunocompromised patients). Moreover, CDC recommends avoiding test-based clearance given the evidence that people with persistently positive PCR tests are not contagious. Test-based clearance should be reserved for rare cases when there is a need to discontinue isolation early, or potentially to inform a decision to prolong isolation for severely immunocompromised patients.

### ROLE OF PCR TESTING AFTER CLINICAL RECOVERY

CDC now recommends that patients who have recovered from Covid-19 and remain asymptomatic should not be re-tested within 3 months after symptom onset, even if they had close contact with another infected person [43]. This is based on observations that persons infected with related endemic human betacoronaviruses become susceptible to reinfection after about 90 days, and therefore a positive SARS-CoV-2 PCR test within 90 days of an initial infection most likely

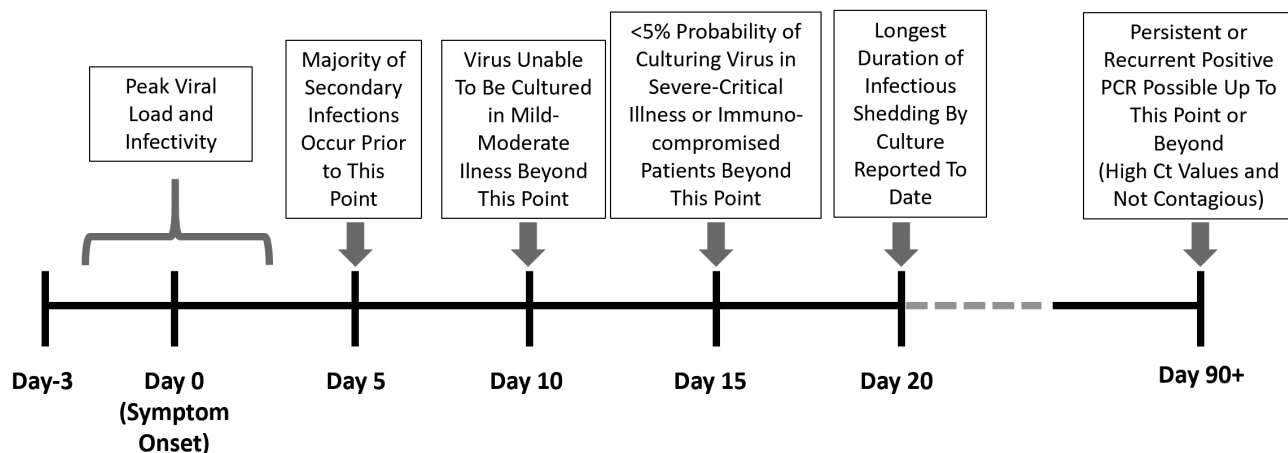

Figure 1. Summary of timeline of SARS-CoV-2 infectivity.

**Table 2. WHO and CDC Guidance for Discontinuing Isolation in Patients with Confirmed Covid-19 Infection and Approach to Persistent or Recurrent Positive PCR Tests**

| Category                                                         | WHO                                                                                                                                                                                 | CDC                                                                                                                                                                                                                                                                                                                                                                                                                                                                                                                                                                               |
|------------------------------------------------------------------|-------------------------------------------------------------------------------------------------------------------------------------------------------------------------------------|-----------------------------------------------------------------------------------------------------------------------------------------------------------------------------------------------------------------------------------------------------------------------------------------------------------------------------------------------------------------------------------------------------------------------------------------------------------------------------------------------------------------------------------------------------------------------------------|
| Symptomatic, initial infection                                   | <ul style="list-style-type: none"> <li>• 10 days after symptom onset, <b>plus</b></li> <li>• At least 3 additional days without symptoms (fever or respiratory symptoms)</li> </ul> | <ul style="list-style-type: none"> <li>• <i>Mild-moderate Illness, Not Severely Immunocompromised:</i> 10 days since symptom onset + 24 h since last fever + improvement in symptoms</li> <li>• <i>Severe-critical Illness OR Severely Immunocompromised:</i> At least 10 days and up to 20 days since symptom onset + 24 h since last fever + improvement in symptoms</li> </ul>                                                                                                                                                                                                 |
| Asymptomatic, initial infection                                  | <ul style="list-style-type: none"> <li>• 10 days after positive test</li> </ul>                                                                                                     | <ul style="list-style-type: none"> <li>• <i>Not Severely Immunocompromised:</i> 10 days since first positive test</li> <li>• <i>Severely Immunocompromised:</i> At least 20 days and up to 20 days since first positive test</li> </ul>                                                                                                                                                                                                                                                                                                                                           |
| Recovered from Covid-19 but persistent or recurrent PCR positive | <ul style="list-style-type: none"> <li>• No specific recommendation</li> </ul>                                                                                                      | <ul style="list-style-type: none"> <li>• <i>Asymptomatic:</i> Retesting not recommended within 3 months after date of symptom onset, even if the patient has close contact with an infected person.</li> <li>• <i>Symptomatic:</i> If new symptoms develop within 3 months of initial symptom onset, and alternative etiology cannot be identified, consider retesting. Isolation may be considered in consultation with infectious disease or infection control experts, especially if symptoms developed within 14 days after close contact with an infected person.</li> </ul> |

Note: WHO also allows for a test-based strategy to discontinue isolation based on clinical recovery and 2 sequential negative PCR tests >24 h apart. CDC no longer recommends a test-based strategy, except to discontinue isolation earlier than outlined by the time-based strategy, or possibly in persons who are severely immunocompromised (in consultation with infectious disease experts).

CDC definitions (severity of illness criteria adapted from the NIH COVID-19 Treatment Guidelines [<https://www.covid19treatmentguidelines.nih.gov/overview/management-of-covid-19/>]):

- Mild Illness: Individuals who have any of the various signs and symptoms of COVID-19 (eg, fever, cough, sore throat, malaise, headache, muscle pain) without shortness of breath, dyspnea, or abnormal chest imaging.
- Moderate Illness: Individuals who have evidence of lower respiratory disease by clinical assessment or imaging, and a saturation of oxygen (SpO<sub>2</sub>) ≥94% on room air at sea level.
- Severe Illness: Individuals who have respiratory frequency > 30 breaths per minute, SpO<sub>2</sub> <94% on room air at sea level (or, for patients with chronic hypoxemia, a decrease from baseline of >3%), ratio of arterial partial pressure of oxygen to fraction of inspired oxygen (PaO<sub>2</sub>/FiO<sub>2</sub>) <300 mmHg, or lung infiltrates >50%
- Critical Illness: Individuals who have respiratory failure, septic shock, and/or multiple organ dysfunction.
- Severely Immunocompromised: chemotherapy for cancer, untreated HIV infection with CD4 T lymphocyte count <200, combined primary immunodeficiency disorder, and receipt of prednisone >20mg/day for more than 14 days.

represents persistent viral debris rather than reinfection. For new symptoms potentially consistent with COVID-19 that develop within 3 months and are not clearly attributable to another diagnosis (such as influenza), CDC states that isolation may be warranted while evaluating for possible SARS-CoV-2 reinfection, in consultation with an infectious disease or infection control expert.

The optimal approach for isolating asymptomatic patients who test positive again >90 days from the original infection (for example, as part of a contact tracing investigation, or during routine screening upon admission to a healthcare facility) remains uncertain. This phenomenon, in our experience, is not uncommon, and most of these patients have high PCR Ct values suggestive of residual viral debris. We believe that the decision to isolate should be made on a case-by-case basis in consultation with infectious disease/infection control experts and/or local public health authorities, taking into account the patient's medical history, time from initial positive test, PCR Ct value, and immune status. Given the uncertainty regarding duration of immunity and reports of confirmed SARS-CoV-2 re-infection in some patients, we believe it is prudent at this time to test all recovered patients who develop new symptoms > 3 months after initial infection and to isolate them if the PCR test is positive.

## CONCLUSIONS

Much progress has been made in understanding the transmission dynamics of SARS-CoV-2 and duration of infectivity. WHO

and CDC have modified their recommendations in response to data indicating that infectivity decreases to essentially zero after about 10 days from symptom onset in mild-moderately ill patients and after about 15 days in critically ill and immunocompromised patients, with a maximum reported interval thus far of 20 days. Additional data confirming these findings in larger and more diverse cohorts are needed to provide further reassurance as to the safety of discontinuing isolation for critically ill, deeply immunocompromised, and otherwise high-risk patients, and to define the optimal approach to retesting and isolation in patients who have recovered from Covid-19.

## Notes

**Role of the funder.** The Centers for Disease Control and Prevention and Agency for Healthcare Research and Quality had no role in the design and conduct of the study; collection, management, analysis, and interpretation of the data; preparation, review, or approval of the manuscript; and decision to submit the manuscript for publication.

**Financial support.** This work was funded by the Centers for Disease Control and Prevention (6U54CK000484-04-02) and the Agency for Healthcare Research and Quality (K08HS025008 to C.R.).

**Potential conflicts of interest.** M. K. and C. R. report personal fees from UpToDate, outside the submitted work. All other authors have no potential conflicts to disclose. All authors have submitted the ICMJE Form for Disclosure of Potential Conflicts of Interest. Conflicts that the editors consider relevant to the content of the manuscript have been disclosed.

## References

1. Guan WJ, Ni ZY, Hu Y, et al. Clinical characteristics of coronavirus disease 2019 in China. *N Engl J Med* 2020; 382:1708–20.

2. Li Q, Guan X, Wu P, et al. Early transmission dynamics in Wuhan, China, of novel coronavirus-infected pneumonia. *N Engl J Med* **2020**; 382:1199–207.
3. Lauer SA, Grantz KH, Bi Q, et al. The incubation period of coronavirus disease 2019 (COVID-19) from publicly reported confirmed cases: estimation and application. *Ann Intern Med* **2020**; 172:577–82.
4. Zou L, Ruan F, Huang M, et al. SARS-CoV-2 viral load in upper respiratory specimens of infected patients. *N Engl J Med* **2020**; 382:1177–9.
5. To KK, Tsang OT, Leung WS, et al. Temporal profiles of viral load in posterior oropharyngeal saliva samples and serum antibody responses during infection by SARS-CoV-2: an observational cohort study. *Lancet Infect Dis* **2020**; 20:565–74.
6. Wolfel R, Corman VM, Guggemos W, et al. Virological assessment of hospitalized patients with COVID-2019. *Nature* **2020**; 581:465–9.
7. Team C-I. Clinical and virologic characteristics of the first 12 patients with coronavirus disease 2019 (COVID-19) in the United States. *Nat Med* **2020**; 26:861–8.
8. He X, Lau EHY, Wu P, et al. Temporal dynamics in viral shedding and transmissibility of COVID-19. *Nat Med* **2020**; 26:672–5.
9. Pan X, Chen D, Xia Y, et al. Asymptomatic cases in a family cluster with SARS-CoV-2 infection. *Lancet Infect Dis* **2020**; 20:410–1.
10. Bai Y, Yao L, Wei T, et al. Presumed asymptomatic carrier transmission of COVID-19. *JAMA* **2020**.
11. Kimball A, Hatfield KM, Arons M, et al; Public Health – Seattle & King County; CDC COVID-19 Investigation Team. Asymptomatic and presymptomatic SARS-CoV-2 infections in residents of a long-term care skilled nursing facility - King County, Washington, March 2020. *MMWR Morb Mortal Wkly Rep* **2020**; 69:377–81.
12. Rothe C, Schunk M, Sothmann P, et al. Transmission of 2019-nCoV infection from an asymptomatic contact in Germany. *N Engl J Med* **2020**; 382:970–1.
13. Qian G, Yang N, Ma AHY, et al. A COVID-19 transmission within a family cluster by presymptomatic infectors in China. *Clin Infect Dis* **2020**.
14. Carrat F, Vergu E, Ferguson NM, et al. Time lines of infection and disease in human influenza: a review of volunteer challenge studies. *Am J Epidemiol* **2008**; 167:775–85.
15. Ip DKM, Lau LLH, Chan KH, et al. The dynamic relationship between clinical symptomatology and viral shedding in naturally acquired seasonal and pandemic influenza virus infections. *Clin Infect Dis* **2016**; 62:431–7.
16. Lau LL, Cowling BJ, Fang VJ, et al. Viral shedding and clinical illness in naturally acquired influenza virus infections. *J Infect Dis* **2010**; 201:1509–16.
17. Saurabh S, Kumar R, Gupta MK, et al. Prolonged persistence of SARS-CoV-2 in the upper respiratory tract of asymptomatic infected individuals. *QJM* **2020**; 113:556–60.
18. Park SY, Yun SG, Shin JW, et al. Persistent severe acute respiratory syndrome coronavirus 2 detection after resolution of coronavirus disease 2019-associated symptoms/signs. *Korean J Intern Med* **2020**; 35:793–6.
19. Deng W, Guang TW, Yang M, et al. Positive results for patients with COVID-19 discharged from hospital in Chongqing, China. *BMC Infect Dis* **2020**; 20:429.
20. Miyamae Y, Hayashi T, Yonezawa H, et al. Duration of viral shedding in asymptomatic or mild cases of novel coronavirus disease 2019 (COVID-19) from a cruise ship: a single-hospital experience in Tokyo, Japan. *Int J Infect Dis* **2020**; 97:293–5.
21. Agarwal V, Venkatakrishnan AJ, Puranik A, et al. Quantifying the prevalence of SARS-CoV-2 long-term shedding among non-hospitalized COVID-19 patients. *medRxiv* **2020**.
22. Xiao AT, Tong YX, Gao C, Zhu L, Zhang YJ, Zhang S. Dynamic profile of RT-PCR findings from 301 COVID-19 patients in Wuhan, China: a descriptive study. *J Clin Virol* **2020**; 127:104346.
23. Shi D, Wu W, Wang Q, et al. Clinical characteristics and factors associated with long-term viral excretion in patients with SARS-CoV-2 infection: a single center 28-day study. *J Infect Dis* **2020**; 222:910–18.
24. Li J, Zhang L, Liu B, Song D. Case report: viral shedding for 60 days in a woman with COVID-19. *Am J Trop Med Hyg* **2020**; 102:1210–3.
25. Liu F, Cai ZB, Huang JS, et al. Positive SARS-CoV-2 RNA recurs repeatedly in a case recovered from COVID-19: dynamic results from 108 days of follow-up. *Pathog Dis* **2020**; 78:ftaa031.
26. Zheng S, Fan J, Yu F, et al. Viral load dynamics and disease severity in patients infected with SARS-CoV-2 in Zhejiang province, China, January–March 2020: retrospective cohort study. *BMJ* **2020**; 369:m1443.
27. Xu K, Chen Y, Yuan J, et al. Factors associated with prolonged viral RNA shedding in patients with COVID-19. *Clin Infect Dis* **2020**; 71:799–806.
28. Qi L, Yang Y, Jiang D, et al. Factors associated with duration of viral shedding in adults with COVID-19 outside of Wuhan, China: a retrospective cohort study. *Int J Infect Dis* **2020**; 96:531–7.
29. Wang K, Zhang X, Sun J, et al. Differences of SARS-CoV-2 shedding duration in sputum and nasopharyngeal swab specimens among adult inpatients with COVID-19 [manuscript published online ahead of print 20 June 2020]. *Chest* **2020**; S0012–3692(20)31718–9.
30. Lo IL, Lio CF, Cheong HH, et al. Evaluation of SARS-CoV-2 RNA shedding in clinical specimens and clinical characteristics of 10 patients with COVID-19 in Macau. *Int J Biol Sci* **2020**; 16:1698–707.
31. Ling Y, Xu SB, Lin YX, et al. Persistence and clearance of viral RNA in 2019 novel coronavirus disease rehabilitation patients. *Chin Med J (Engl)* **2020**; 133:1039–43.
32. Xu CLH, Raval M, Schnall JA, Kwong JC, Holmes NE. Duration of respiratory and gastrointestinal viral shedding in children with SARS-CoV-2: a systematic review and synthesis of data. *Pediatr Infect Dis J* **2020**; 39:e249–56.
33. Yuan J, Kou S, Liang Y, Zeng J, Pan Y, Liu L. PCR assays turned positive in 25 discharged COVID-19 patients [manuscript published online ahead of print 8 April 2020]. *Clin Infect Dis* **2020**; ciaa398.
34. Tang X, Zhao S, He D, et al. Positive RT-PCR tests among discharged COVID-19 patients in Shenzhen, China [manuscript published online ahead of print 16 April 2020]. *Infect Control Hosp Epidemiol* **2020**; 1–2.
35. Tom MR, Mina MJ. To interpret the SARS-CoV-2 test, consider the cycle threshold value [manuscript published online ahead of print 21 May 2020]. *Clin Infect Dis* **2020**; ciaa619.
36. Young BE, Ong SWX, Kalimuddin S, et al. Epidemiologic features and clinical course of patients infected with SARS-CoV-2 in Singapore. *JAMA* **2020**; 323:1488–94.
37. van Kasteren PB, van der Veer B, van den Brink S, et al. Comparison of seven commercial RT-PCR diagnostic kits for COVID-19. *J Clin Virol* **2020**; 128:104412.
38. Chang MC, Hur J, Park D. Interpreting the COVID-19 test results: a guide for physiatrists. *Am J Phys Med Rehabil* **2020**; 99:583–5.
39. Rogers AA, Baumann RE, Borillo GA, et al. Evaluation of transport media and specimen transport conditions for the detection of SARS-CoV-2 using real time reverse transcription PCR. *J Clin Microbiol* **2020**; 58:e00708–20.
40. Rhoads D, Peaper DR, She RC, et al. College of American Pathologists (CAP) Microbiology Committee Perspective: caution must be used in interpreting the Cycle Threshold (Ct) value [manuscript published online ahead of print 12 August 2020]. *Clin Infect Dis* **2020**; ciaa1199.
41. Alexandersen S, Chamings A, Bhatta TR. SARS-CoV-2 genomic and subgenomic RNAs in diagnostic samples are not an indicator of active replication. *medRxiv* [Preprint]. August 16, 2020. **2020**.
42. Sia SF, Yan LM, Chin AWH, et al. Pathogenesis and transmission of SARS-CoV-2 in golden hamsters. *Nature* **2020**; 583:834–8.
43. Centers for Disease Control and Prevention: symptom-based strategy to discontinue isolation for persons with COVID-19 (Updated July 22, 2020). Available at: <https://www.cdc.gov/coronavirus/2019-ncov/community/strategy-discontinue-isolation.html>. Accessed 14 August 2020.
44. Young B, Ong SW, Ng LF, et al. Immunological and viral correlates of COVID-19 disease severity: a prospective cohort study of the first 100 patients in Singapore. *Lancet* **2020**; In press.
45. La Scola B, Le Bideau M, Andreani J, et al. Viral RNA load as determined by cell culture as a management tool for discharge of SARS-CoV-2 patients from infectious disease wards. *Eur J Clin Microbiol Infect Dis* **2020**; 39:1059–61.
46. Million M, Lagier JC, Gautret P, et al. Early treatment of COVID-19 patients with hydroxychloroquine and azithromycin: a retrospective analysis of 1061 cases in Marseille, France. *Travel Med Infect Dis* **2020**; 35:101738.
47. Bullard J, Dust K, Funk D, et al. Predicting infectious SARS-CoV-2 from diagnostic samples [manuscript published online ahead of print 22 May 2020]. *Clin Infect Dis* **2020**; ciaa638.
48. van Kampen JJ, van de Vijver DA, Fraaij PL, et al. Shedding of infectious virus in hospitalized patients with coronavirus disease-2019 (COVID-19): duration and key determinants. *medRxiv* **2020**.
49. Cheng HY, Jian SW, Liu DP, et al. Contact tracing assessment of COVID-19 transmission dynamics in Taiwan and risk at different exposure periods before and after symptom onset [manuscript published online ahead of print 1 May 2020]. *JAMA Intern Med* **2020**; e202020.
50. Lu J, Peng J, Xiong Q, et al. Clinical, immunological and virological characterization of COVID-19 patients that test re-positive for SARS-CoV-2 by RT-PCR. *medRxiv* **2020**.
51. Korean CDC: findings from investigation and analysis of re-positive cases (May 19th, 2020). Available at: <https://www.cdc.go.kr/board/board.es?mid=a30402000000&bid=0030>. Accessed 20 July 2020.
52. Xiao F, Sun J, Xu Y, et al. Infectious SARS-CoV-2 in feces of patient with severe COVID-19. *Emerg Infect Dis* **2020**; 26:1920–2.
53. Liu WD, Chang SY, Wang JT, et al. Prolonged virus shedding even after seroconversion in a patient with COVID-19. *J Infect* **2020**; 81:318–56.
54. Hung IF, Lung KC, Tso EY, et al. Triple combination of interferon beta-1b, lopinavir-ritonavir, and ribavirin in the treatment of patients admitted to hospital with COVID-19: an open-label, randomised, phase 2 trial. *Lancet* **2020**; 395:1695–704.
55. Chandrashekar A, Liu J, Martinot AJ, et al. SARS-CoV-2 infection protects against rechallenge in rhesus macaques. *Science* **2020**; 369:812–7.

56. Deng W, Bao L, Liu J, et al. Primary exposure to SARS-CoV-2 protects against reinfection in rhesus macaques. *Science* **2020**; 369:818–23.
57. Amanat F, Stadlbauer D, Strohmeier S, et al. A serological assay to detect SARS-CoV-2 seroconversion in humans. *Nat Med* **2020**; 26:1033–6.
58. Thevarajan I, Nguyen THO, Koutsakos M, et al. Breadth of concomitant immune responses prior to patient recovery: a case report of non-severe COVID-19. *Nat Med* **2020**; 26:453–5.
59. Wu F, Wang A, Liu M, et al. Neutralizing antibody responses to SARS-CoV-2 in a COVID-19 recovered patient cohort and their implications. *MedRxiv* [Preprint]. July 11, 2020.
60. Wang X, Guo X, Xin Q, et al. Neutralizing antibodies responses to SARS-CoV-2 in COVID-19 inpatients and convalescent patients [manuscript published online ahead of print 4 June 2020]. *Clin Infect Dis* **2020**; ciaa721.
61. Long QX, Tang XJ, Shi QL, et al. Clinical and immunological assessment of asymptomatic SARS-CoV-2 infections. *Nat Med* **2020**; 26:1200–4.
62. Ibarroondo FJ, Fulcher JA, Goodman-Meza D, et al. Rapid decay of anti-SARs-CoV-2 antibodies in persons with mild Covid-19. *New Engl J Med* **2020**; NEJMc2025179.
63. World Health Organization. Clinical management of COVID-19 (Interim Guidance), published May 27, **2020**.
64. Centers for Disease Control and Prevention: Discontinuation of Transmission-Based Precautions and Disposition of Patients with COVID-19 in Healthcare Settings (Interim Guidance): Updated August 10, 2020. Available at: <https://www.cdc.gov/coronavirus/2019-ncov/hcp/disposition-hospitalized-patients.html>. Accessed 14 August 2020.
